# Supplementary material
Source: PubMed Central journal article supplement (PMC5493794)
Supplement: rsif20170105supp1.pdf [file rsif20170105supp1.pdf]

Supporting Information: Uncovering the  
Underlying Mechanism of Cancer  
Tumorigenesis and Development under  
Immune Microenvironment from Global  
Quantification of the Landscape

Wenbo Li and Jin Wang

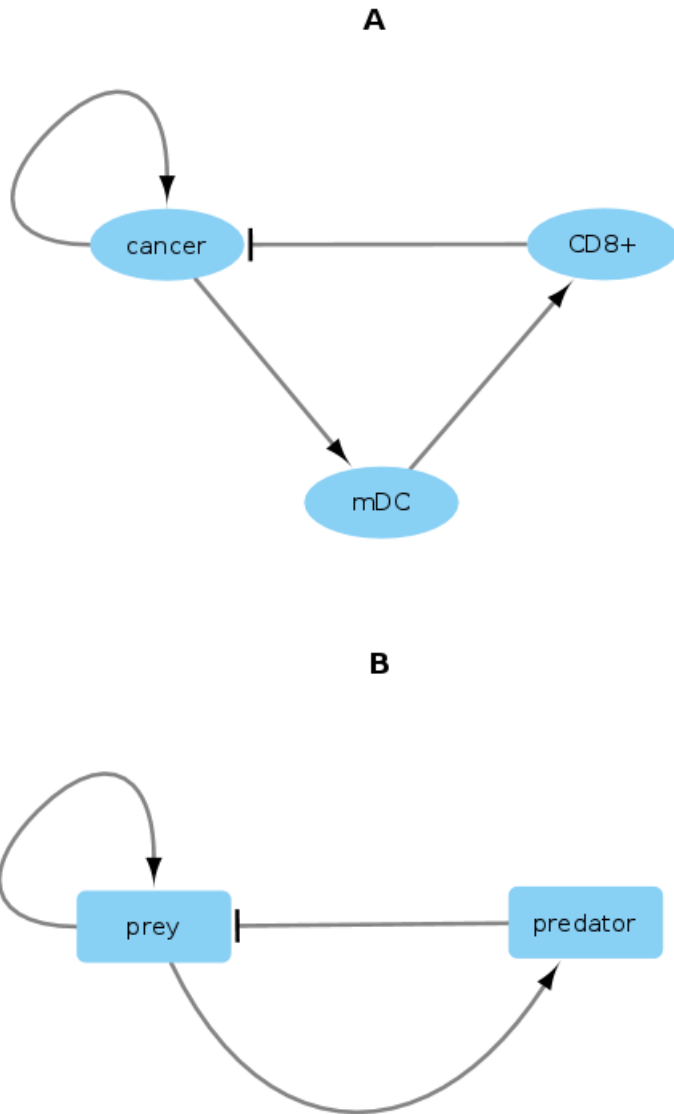

Figure S1: Diagram of immune module and prey-predator system for oscillations. (A)The module of the cancer cells, mature dendritic cells and  $CD8^+$  T cells. (B)The prey-predator system. Black arrows represent activation. Black bars represent inhibition.

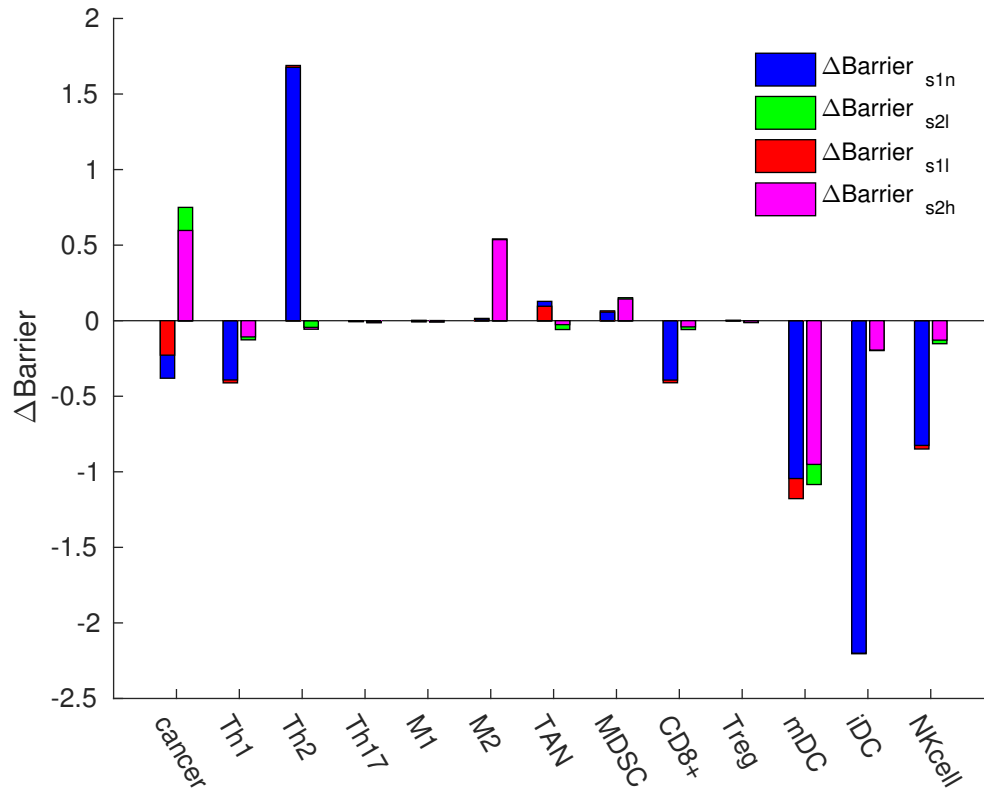

Figure S2: Barrier changes of different cell types injections.  $\Delta\text{Barrier}_{s1n}$ : the change of barrier between s1 and normal steady state.  $\Delta\text{Barrier}_{s1l}$ : the change of barrier between s1 and low cancer state.  $\Delta\text{Barrier}_{s2l}$ : the change of barrier between s2 and low cancer steady state.  $\Delta\text{Barrier}_{s2h}$ : the change of barrier between s2 and high cancer steady state. The parameter  $c_i = 0.2$ .
