# Supplementary material
Source: PubMed Central journal article supplement (PMC5493794)
Supplement: rsif20170105supp3.pdf [file rsif20170105supp3.pdf]

| $v_{ij}$      | cancer | Th1      | Th2      | Th17    | M1       | M2       | TAN      | MDSC | CD8+     | Treg      | mDC      | iDC      | Nkcell   |
|---------------|--------|----------|----------|---------|----------|----------|----------|------|----------|-----------|----------|----------|----------|
| cancer        | 27.99  | Nan      | Nan      | 2.98[1] | Nan      | Nan      | 11.13[2] | 3.22 | 0.6      | Nan       | 29.25[3] | 24.69[4] | 12.47[5] |
| Th1           | 0.61   | Nan      | Nan      | Nan     | Nan      | Nan      | Nan      | Nan  | Nan      | Nan       | Nan      | Nan      | Nan      |
| Th2           | 1.87   | Nan      | Nan      | Nan     | Nan      | Nan      | Nan      | Nan  | Nan      | Nan       | Nan      | Nan      | Nan      |
| Th17          | Nan    | Nan      | Nan      | Nan     | Nan      | Nan      | Nan      | Nan  | Nan      | Nan       | Nan      | Nan      | Nan      |
| M1            | 0.44   | 1.76     | Nan      | Nan     | Nan      | Nan      | Nan      | Nan  | Nan      | Nan       | Nan      | Nan      | Nan      |
| M2            | 1.38   | Nan      | Nan      | Nan     | Nan      | Nan      | 0.77     | Nan  | Nan      | Nan       | Nan      | Nan      | Nan      |
| TAN           | Nan    | Nan      | Nan      | Nan     | Nan      | Nan      | Nan      | Nan  | 1.44     | Nan       | Nan      | Nan      | Nan      |
| MDSC          | 2.39   | Nan      | Nan      | Nan     | Nan      | Nan      | Nan      | Nan  | 0.29     | 1.26      | Nan      | Nan      | Nan      |
| CD8+          | 1.24   | Nan      | Nan      | Nan     | Nan      | Nan      | Nan      | Nan  | Nan      | Nan       | Nan      | Nan      | Nan      |
| Treg          | Nan    | Nan      | Nan      | Nan     | Nan      | Nan      | Nan      | Nan  | Nan      | Nan       | Nan      | Nan      | Nan      |
| mDC           | 0.54   | 16.03[6] | 10.31[6] | Nan     | Nan      | Nan      | Nan      | Nan  | 14.83[7] | Nan       | Nan      | Nan      | Nan      |
| iDC           | 1.02   | Nan      | Nan      | Nan     | Nan      | Nan      | Nan      | Nan  | Nan      | 1.79      | 0.48     | Nan      | Nan      |
| Nkcell        | 1.14   | Nan      | Nan      | Nan     | Nan      | Nan      | Nan      | Nan  | Nan      | Nan       | Nan      | Nan      | Nan      |
| IL-2          | Nan    | Nan      | Nan      | Nan     | Nan      | Nan      | Nan      | Nan  | 2.42     | 1         | Nan      | Nan      | 3.11     |
| IL-4          | Nan    | 0.93     | 13.74[8] | Nan     | 0.82     | 15.49[9] | Nan      | 1.98 | 0.8      | 0.75      | Nan      | Nan      | Nan      |
| IL-6          | Nan    | Nan      | 1.16     | 1.08    | Nan      | Nan      | Nan      | 1.12 | Nan      | 0.84      | Nan      | Nan      | Nan      |
| IL-8          | Nan    | Nan      | Nan      | Nan     | Nan      | Nan      | 1.07     | Nan  | Nan      | Nan       | Nan      | Nan      | Nan      |
| IL-10         | 0.54   | 0.58     | 2.25     | Nan     | Nan      | Nan      | Nan      | Nan  | 0.71     | Nan       | 0.68     | Nan      | Nan      |
| IL-12         | Nan    | 2.42     | Nan      | Nan     | Nan      | Nan      | Nan      | Nan  | 1.1      | 0.93      | Nan      | Nan      | 1.1      |
| IL-13         | Nan    | Nan      | Nan      | Nan     | 0.96     | Nan      | Nan      | 1.51 | Nan      | Nan       | Nan      | Nan      | Nan      |
| IL-17         | Nan    | Nan      | Nan      | Nan     | Nan      | Nan      | 1.42     | Nan  | Nan      | Nan       | Nan      | Nan      | Nan      |
| IL-21         | Nan    | Nan      | Nan      | 1.31    | Nan      | Nan      | Nan      | Nan  | 1.24     | 0.54      | Nan      | Nan      | 1.14     |
| IL-23         | Nan    | Nan      | Nan      | 1.63    | Nan      | Nan      | Nan      | Nan  | 0.76     | Nan       | Nan      | Nan      | Nan      |
| IFN- $\gamma$ | 0.94   | Nan      | 0.87     | Nan     | 13.54[7] | Nan      | Nan      | 1.98 | Nan      | 0.52      | Nan      | Nan      | Nan      |
| TGF- $\beta$  | 1.17   | Nan      | Nan      | 1.08    | 0.64     | Nan      | Nan      | 1.99 | Nan      | 16.73[10] | Nan      | Nan      | 0.86     |
| TNF- $\alpha$ | Nan    | Nan      | Nan      | Nan     | Nan      | Nan      | 1.07     | Nan  | Nan      | 2.21      | Nan      | Nan      | Nan      |

[1]Nasr Y.A. Hemdan. Anti-cancer versus cancer-promoting effects of the interleukin-17-producing t helper cells. Immunology Letters, 149(1-2):123-133, jan 2013.

[2]Davalyn R. Powell and Anna Huttenlocher. Neutrophils in the tumor microenvironment. Trends in Immunology, 37(1):41-52, jan 2016.

[3]Yang Ma, Galina V. Shurin, Zhu Peiyuan, and Michael R. Shurin. Dendritic cells in the cancer microenvironment. Journal of Cancer, 4(1):36-44, 2013.

[4]Aleksandra M. Dudek, Shaun Martin, Abhishek D. Garg, and Patrizia Agostinis. Immature, semi-mature, and fully mature dendritic cells: Toward a DC-cancer cells interface that augments anticancer immunity. Front. Immunol., 4, 2013.

[5]Maelig G. Morvan and Lewis L. Lanier. NK cells and cancer: you can teach innate cells new tricks. Nature Reviews Cancer, 16(1):7-19, dec 2015.

[6]M. Strioga, V. Schijns, D. J. Powell, V. Pasukoniene, N. Dobrovolskiene, and J. Michalek. Dendritic cells and their role in tumor immunosurveillance. Innate Immunity, 19(1):98-111, jun 2012.

[7]S M W ormann, K N Diakopoulos, M Lesina, and H Alg ul. The immune network in pancreatic cancer development and progression. Oncogene, 33(23):2956-2967, jul 2013.

[8]Caroline L Sokol, Gregory M Barton, Andrew G Farr, and Ruslan Medzhitov. A mechanism for the initiation of allergen-induced t helper type 2 responses. Nature Immunology, 9(3):310-318, dec 2007.

[9]Maria R. Galdiero, Cecilia Garlanda, S ebastien Jaillon, Gianni Marone, and Alberto Mantovani. Tumor associated macrophages and neutrophils in tumor progression. Journal of Cellular Physiology, 228(7):1404-1412,mar 2013.

[10]Wenhui Qi, Xiaojuan Huang, and Junyan Wang. Correlation between th17 cells and tumor microenvironment. Cellular Immunology, 285(1-2):18-22, sep 2013.
